# Supplementary material for: Traffic, marine ships and nucleation as the main sources of ultrafine particles in suburban Shanghai, China
Source: Royal Society of Chemistry journal article supplement (doi:10.1039/d3ea00096f), 2023-01-01
Supplement: d3ea00096f1.pdf [file d3ea00096f1.pdf]

1 **Supplemental Information for:**  
2 **Traffic, marine ships and nucleation as the main sources of ultrafine particles in**  
3 **suburban Shanghai, China**

4  
5 Qingsong Wang,<sup>‡a</sup> Juntao Huo,<sup>‡b</sup> Hui Chen,<sup>\*ahi</sup> Yusen Duan,<sup>\*b</sup> Qingyan Fu,<sup>b</sup> Yi Sun,<sup>b</sup>  
6 Kun Zhang,<sup>a</sup> Ling Huang,<sup>a</sup> Yangjun Wang,<sup>a</sup> Jiani Tan,<sup>a</sup> Li Li,<sup>\*a</sup> Lina Wang,<sup>c</sup> Dan Li,<sup>c</sup>  
7 Christian George,<sup>cd</sup> Abdelwahid Mellouki<sup>efg</sup> and Jianmin Chen<sup>cj</sup>

8  
9 a Key Laboratory of Organic Compound Pollution Control Engineering, School of  
10 Environmental and Chemical Engineering, Shanghai University, Shanghai, 200444,  
11 China

12 b Shanghai Environmental Monitoring Center, Shanghai, 200235, China

13 c Shanghai Key Laboratory of Atmospheric Particle Pollution and Prevention (LAP3)  
14 Department of Environmental Science and Engineering, Fudan University,  
15 Shanghai, 200433, China

16 d Univ Lyon, Université Claude Bernard Lyon 1, CNRS, IRCELYON, F-69626  
17 Villeurbanne, France

18 e University Mohammed 6 Polytechnic (UM6P), Lot 660, Hay Moulay Rachid Ben  
19 Guerir, 43150, Morocco

20 f Institut de Combustion Aérothermique, Réactivité et Environnement, Centre  
21 National de la Recherche Scientifique (ICARE-CNRS), Observatoire des Sciences  
22 de l'Univers en région Centre, 45071, Orleans, France

23 g Environmental Research Institute, Shandong University, Jinan, 250100, Shandong,  
24 China

25 h State Environmental Protection Key Laboratory of Formation and Prevention of  
26 Urban Air Pollution Complex, Shanghai Academy of Environment Sciences,  
27 Shanghai, 200233, China

28 i Key Laboratory of Atmospheric Chemistry, China Meteorological Administration,  
29 Beijing, 100081, China

30 j Institute of Eco-Chongming, Shanghai, 200062, China

31 ‡ The authors contributed equally.

32 \* Corresponding authors: Hui Chen, [huichen@shu.edu.cn](mailto:huichen@shu.edu.cn); Yusen Duan,

33 [duanys@sheemc.cn](mailto:duanys@sheemc.cn); Li Li, [lily@shu.edu.cn](mailto:lily@shu.edu.cn).

## 34 **1. Sampling and data**

35 DSL site is located in Qingpu District in a western suburb of Shanghai, and it is  
36 surrounded by Dianshan Lake, arable land, residences, rivers, and road network (Fig.  
37 1a). DSL site is 0.4 km from the nearest G318 national highway and 1.5 km from the  
38 nearest G50 expressway. There are no traffic restrictions on the vehicle type and traffic  
39 time around DSL site. Since it is located at the junction of Shanghai, Zhejiang Province,  
40 and Jiangsu Province, all of which are well-developed areas with large populations, this  
41 site is often affected by regional pollution transport and suffers from photochemical  
42 pollution episodes.<sup>1</sup> DT site is inside the Chongming Dongtan Birds National Nature  
43 Reserve, which is on the east corner of Chongming island, as the entrance of Yangtze  
44 River to East China Sea. The reserve area is not open to the public. Chongming island  
45 has formulated a world-class ecological island construction plan, and the development  
46 of highly polluting industries is constrained. The main expressway G40 across  
47 Chongming Island is 15 km away from DT site.

48 SMPS used in this observation campaign has a single-channel uncertainty of  
49  $\pm 15\%$ . The sampling protocol for PNC measurement adheres to the EUSAAR-ACTRIS  
50 protocol.<sup>2</sup> The sampler inlet is equipped with an air dryer situated 10 m above the  
51 ground. From January 1 to March 31, 2021, approximately 5% of the 5-min and 1% of  
52 the hourly PNSD data are missing or invalid at both sites (Table S1). The mass  
53 concentrations of PM<sub>2.5</sub> were measured by a tapered element oscillating microbalance  
54 with filter dynamics measurement system (1405-F, TEOM-FDMS, Thermo  
55 Scientific<sup>TM</sup>, USA).

56 The gaseous species were continuously measured using a set of gas analyzers  
57 including an O<sub>3</sub> analyzer (model 49i), NO/NO<sub>2</sub> analyzer (model 42i), SO<sub>2</sub> analyzer  
58 (model 43i), and CO analyzer (model 48i, Thermo Scientific<sup>TM</sup>, USA). The  
59 concentrations of OC/EC, water-soluble ions and trace metal elements in PM<sub>2.5</sub> were  
60 measured by a semi-continuous thermo-optical carbon analyzer (Sunset Laboratory,  
61 USA), a Monitor for AeRosols and Gases in Ambient air (MARGA, ADI 2080,  
62 Metrohm, Netherlands), and a Multi-Metals Monitor System with dispersive X-ray

63 fluorescence analysis (Xact<sup>®</sup> 625, Cooper Environmental, USA), respectively. More  
64 details can be found in the earlier publications.<sup>3</sup>

65 Meteorological parameters, including wind speed (Ws), wind direction (Wd),  
66 surface pressure (Press), relative humidity (RH), and ambient temperature (Temp) were  
67 simultaneously measured at respective site. Surface solar radiation (Ssr), total cloud  
68 cover (Tcc), and boundary layer height (Blh) are extracted from the gridded data of  
69 ERA5 (the fifth generation ECMWF reanalysis, accessible at  
70 <https://cds.climate.copernicus.eu/cdsapp#!/dataset/reanalysis-era5-single-levels>, last  
71 accessed: June 2023).

72 The median PNC<sub>Total</sub> at DSL and DT sites are 7,300 # cm<sup>-3</sup> and 4,500 # cm<sup>-3</sup>,  
73 respectively, which is lower than the reported value of 15,300 # cm<sup>-3</sup> in urban Shanghai  
74 in 2013.<sup>4</sup> A recent land-use regression study in Shanghai reported higher PNC<sub>UFPs</sub> with  
75 a portable UFPs monitor.<sup>5</sup> In urban environments, there are more pollution sources,  
76 such as cooking activities,<sup>6</sup> which leads to higher PNC. The measurement duration is  
77 probably not the driving factor since studies in cities near Shanghai (i.e., Nanjing and  
78 Hangzhou) showed that PNC varied in a small range (<10%) among the seasons.<sup>7</sup> This  
79 needs further investigation because Shanghai is a coastal city and can be more easily  
80 influenced by ocean air masses. Effective measures against PM<sub>2.5</sub> in recent years in  
81 China can be another reason for the reduction in PNC<sub>UFPs</sub>. PNC/PM<sub>2.5</sub> ratio is used as a  
82 quantitative measure of the relationship between PNC and PM<sub>2.5</sub> and to investigate how  
83 it varies for different cities and for different durations.<sup>4</sup> The highest PNC/PM<sub>2.5</sub> (>  
84 1×10<sup>9</sup> # μg<sup>-1</sup>) has been observed at roadside sites in the cities of very low PM<sub>2.5</sub>.<sup>4</sup>  
85 PNC/PM<sub>2.5</sub> at the two sites in this study is 0.19×10<sup>9</sup> # μg<sup>-1</sup> (DSL) and 0.22 ×10<sup>9</sup> # μg<sup>-1</sup>  
86 (DT), respectively (Fig. S7), which are comparable to those Chinese cities of high  
87 PM<sub>2.5</sub>.<sup>4</sup> This can be attributed to the fact that PM<sub>2.5</sub> originating from primary emissions  
88 and secondary formations with larger size do not contribute to UFPs, which leads to  
89 low PNC/PM<sub>2.5</sub>. In addition, the size range of PNSD is the other important factor for  
90 PNC measurement. Our measurements were in a smaller range compared to the other  
91 studies and resulted in underestimated PNC (Fig. S7).

## 92 2. Implementation details of NMF model

93 In our study, the NMF analysis is performed using the “NMF” package<sup>8</sup> in R  
94 version 4.2.3. We removed invalid values from the original data and filled in  
95 approximately 1% missing hourly data by using the “missForest” package.<sup>9</sup> The  
96 principle of “missForest” is to use a random forest that has been trained on the  
97 observations of the data matrix to predict the missing values.<sup>10</sup>

98 It is important to determine the optimal number of factors (rank number,  $r$ ). A  
99 common way of deciding on  $r$  is to try different values and choose the best value  
100 according to this quality criteria.<sup>11</sup> Brunet et al.<sup>12</sup> proposed to take the first value of  $r$   
101 for which the cophenetic coefficient starts decreasing, Hutchins et al.<sup>13</sup> suggested to  
102 choose the first value where the RSS curve presents an inflection point. The quality  
103 criteria is provided as NMF rank survey in “NMF” package.<sup>8</sup> The results of the NMF  
104 rank survey are shown in Fig. S9. NMF rank survey and reordered consensus matrices  
105 suggest the rank number an objective consideration of the quantitative cophenetic  
106 coefficient rather than a subjective evaluation.<sup>12</sup>

107 **DSL site.** Great drop can be observed when  $r$  increases from 4 to 5 and from 5 to  
108 6. The recorded consensus matrices show a nested structure as  $k$  increases from 2 to 5.  
109 Clear block diagonal patterns attest to the robustness of models with 2, 3, 4, and 5  
110 clusters, whereas a  $r$ -6 factorization shows increased dispersion. Cophenetic correlation  
111 and consensus matrices do not suggest a rank higher than 6.

112 **DT site.** There are two plate value ( $r = 2-4$  and  $r = 5-7$ , respectively) in  
113 cophenetic correlation when rank increases from 2 to 10. The recorded consensus  
114 matrices show a nested structure as  $r$  increases from 2 to 6. The boundaries among the  
115 clusters for  $r = 5, 6$ , are less distinct than those for  $r = 2-4$ . Cophenetic correlation and  
116 consensus matrices do not suggest a rank higher than 6.

117 The boundaries of consensus matrices for  $r = 5$  at both sites are less distinct than  
118 those for smaller  $r$ . This is considered reasonable since PNSD from the sole emission  
119 source are not completely monodisperse (e.g., different types of vehicles and ships) and  
120 can contribute to the neighboring size bins. The PNSD reaching the site can also be

121 influenced by the transport time (coagulation and condensation processes). The  
122 overlapping of the factors (clusters) cannot be prevented. Hence, we determine  $r$  by  
123 carefully investigating if the resolved factors provide meaningful information.

124 The meanings of resolved factors for  $r = 5$  at both sites have been introduced in  
125 the main body text of this study. The results of  $r$ -6 factorization at both sites are  
126 illustrated in Fig. S12. The uncentered correlation coefficient (UCC) reported by  
127 Ulbrich et al. is also introduced to further validate the  $r$ .<sup>14</sup> The UCC is the cosine of the  
128 angle between a pair of PNSD or time spectra (TS) as vectors, such that  
129  $UC = \cos \theta = \mathbf{x} \cdot \mathbf{y} / (\|\mathbf{x}\| \|\mathbf{y}\|)$ , where  $x$  and  $y$  denote a pair of PNSD or TS as vectors.  
130 The results of the UCC assessment are shown in Fig. S11.

131 Comparing Fig. 2 and S12, the largest difference between the results of 5 and 6  
132 factors is that N5 at DSL site and N'3 at DT site are further separated to two factors,  
133 which are noted as F5a and F5b, and F'3a and F'3b, respectively (Fig. S13). At DSL  
134 site, F5a and F5b both exhibit clear bimodal distribution (Fig. S12a), which do not  
135 provide further meaningful interpretation. And the 6-factor solution results in high  
136  $UCC_{\text{PNSD}} (> 0.7)$  for F4\_F5b and F1\_F2 and high  $UCC_{\text{TS}} (> 0.8)$  for F4\_F5a. Similarly,  
137 6-factor solution at DT site leads to high  $UCC_{\text{PNSD}} (> 0.8)$  for F'4\_F'5 and high  $UCC_{\text{TS}}$   
138 ( $> 0.7$ ) for the neighboring factors among F'2, F'3a, F'3b and F4 (Fig. S11). This  
139 suggests that if  $r$  increases from 5 to 6, there will be even more overlap in PNSD and  
140 time series. 5-factor results show that N'3 is marine ship emissions but occasionally  
141 influenced by transport pollution.

142 The rank number of 5 is ultimately determined. The resolved profiles are positive,  
143 sparse, localized, and relatively independent, which makes a natural compact  
144 decomposition for interpretation. Moreover, the good fit of the NMF output results with  
145 the observation proves the good performance of NMF (Fig. S10).

### 146 **3. Nonparametric tests on PM<sub>2.5</sub>-bound V at DT site**

147 In order to explore the differences in the distribution of V concentration among  
148 the groups in Fig 5b, the data of each group in Fig 5b were analyzed for significance.  
149 Firstly, IBM SPSS software was used to test the chi-square of the five groups of data,

150 and the results showed that none of the five groups of data satisfied the chi-square.  
 151 Therefore, we used the nonparametric independent sample test, again using IBM SPSS  
 152 software. The results of the nonparametric test are shown in Table S3. The results show  
 153 that there is no significant difference only between N'1, N'4, and N'5, while all other  
 154 groups are significantly different from each other. Therefore, it can be stated that at the  
 155 DT site, the concentration of V corresponding to the data above the 75<sup>th</sup>-percentile of  
 156 N'2 and N'3 is significantly higher than the concentration of V corresponding to the  
 157 other factors. And the concentration of V corresponding to the data above the 75<sup>th</sup>-  
 158 percentile of N'3 is significantly higher than the concentration of V corresponding to  
 159 N'2.

#### 160 4. Respiratory deposits of particles

161 **ICRP model.** Impaction, sedimentation, diffusion are the three primary  
 162 mechanisms of particle deposition in the airways. Particle transport and deposition in  
 163 the airways varies depending on physiological factors, such as breathing rates, and on  
 164 particle characteristics, such as size. Particles can be deposited in three different regions  
 165 of the respiratory system: Head airway (HA, including nasal, pharyngeal and laryngeal  
 166 passages), Tracheobronchial (TB), Alveolar (Alve, including pulmonary). International  
 167 Commission on Radiological Protection (ICRP) obtained mathematical models of these  
 168 three sedimentation modes through experimental data simulation in healthy adults.<sup>15</sup>  
 169 The ICRP model defines the formula for calculating the lung deposition efficiency as  
 170 follows. The deposition fraction for the HA ( $DF_{HA}$ ) is:

$$171 \quad DF_{HA} = IF \left( \frac{1}{1 + \exp^{6.84 + 1.183 \ln D_p}} + \frac{1}{1 + \exp^{0.924 - 1.885 \ln D_p}} \right),$$

172 where IF is the inhalable fraction,  $IF = 1 - 0.5 \left( 1 - \frac{1}{1 + 0.00076 D_p^{2.8}} \right)$ .

173 The deposition fraction for the TB ( $DF_{TB}$ ) is:

$$174 \quad DF_{TB} = \frac{0.00352}{D_p} \left[ \exp^{-0.234(\ln D_p + 3.40)^2} + 63.9 \exp^{-0.819(\ln D_p - 1.61)^2} \right],$$

175 The deposition fraction for the Alve ( $DF_{Alve}$ ) is:

$$176 \quad DF_{Alve} = \frac{0.0155}{D_p} \left[ \exp^{-0.416(\ln D_p + 2.84)^2} + 19.11 \times \exp^{-0.482(\ln D_p - 1.362)^2} \right],$$

177 The total deposition fraction ( $DF_{Total}$ ) is the sum of the regional depositions:

178  $DF_{Total} = DF_{HA} + DF_{TB} + DF_{Alve}.$

179 **Particle number concentrations deposited in respiratory system (PNC<sub>Deposits</sub>).**

180 After obtaining the DF as a function of D<sub>p</sub>, the PNC deposited in HA (PNC<sub>Deposits, HA</sub>),  
181 in TB (PNC<sub>Deposits, TB</sub>) and in Alve (PNC<sub>Deposits, Alve</sub>) can be obtained from the following  
182 equations:

183  $PNC_{Deposits,HA} = \sum_{D_p} DF_{HA} \times PNC(D_p),$

184  $PNC_{Deposits,TB} = \sum_{D_p} DF_{TB} \times PNC(D_p),$

185  $PNC_{Deposits,Alve} = \sum_{D_p} DF_{Alve} \times PNC(D_p),$

186 where PNC(D<sub>p</sub>) refers to the PNC of sources at different particle sizes. PNC<sub>Deposits</sub> is the  
187 sum of PNC<sub>Deposits, HA</sub>, PNC<sub>Deposits, TB</sub> and PNC<sub>Deposits, Alve</sub>:

188  $PNC_{Deposits} = \sum_{D_p} DF_{Total} \times PNC(D_p) = PNC_{Deposits,HA} + PNC_{Deposits,TB} +$   
189  $PNC_{Deposits,Alve}.$

190



191 **General Description.**

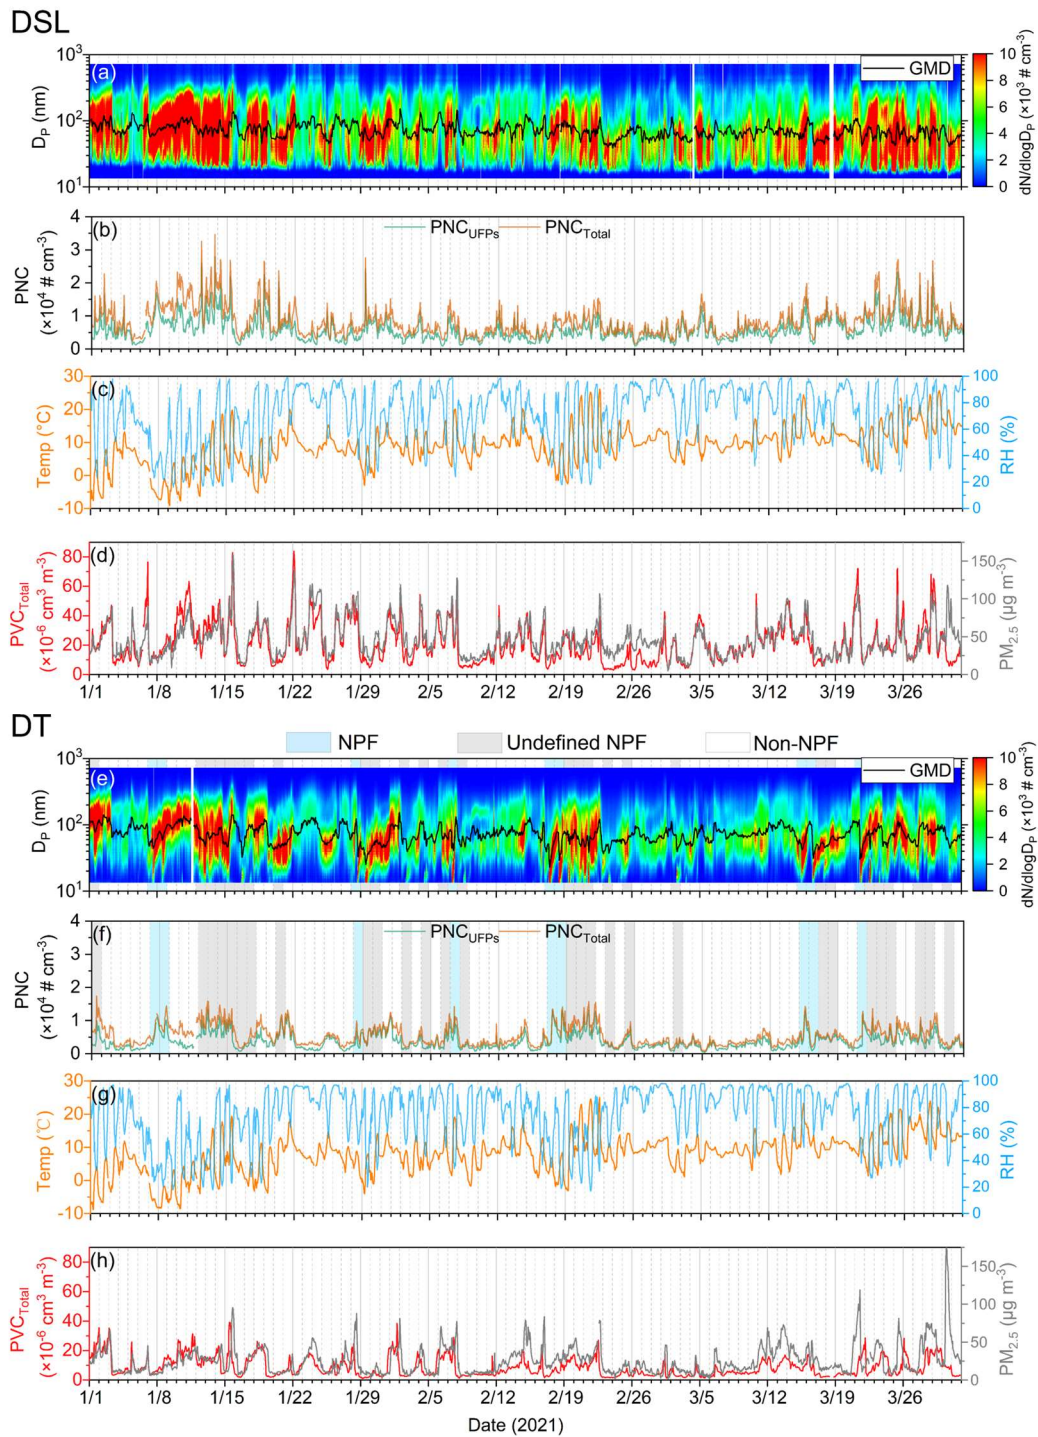

192

193 **Figure S1.** Time series plots of PNSD and GMD (a, e),  $PNC_{UFPs}$  and  $PNC_{Total}$  (b, f),  
 194 ambient temperature (Temp) and relative humidity (RH) (c, g),  $PVC_{Total}$  and  $PM_{2.5}$  (d,  
 195 h) at DSL (a–d) and DT (e–h) sites. At DT site, NPF, undefined NPF and non-NPF  
 196 days are marked with different color shading.

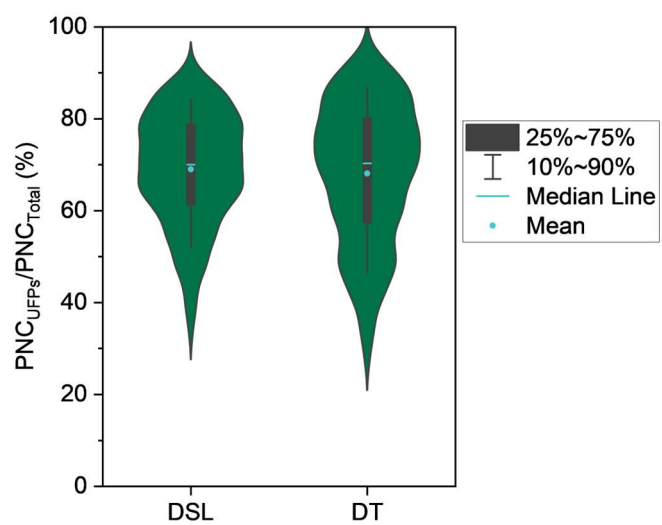

197

198 **Figure S2.** Boxplot of the ratios between PNC<sub>UFPs</sub> and PNC<sub>Total</sub> for DSL and DT Sites.

199

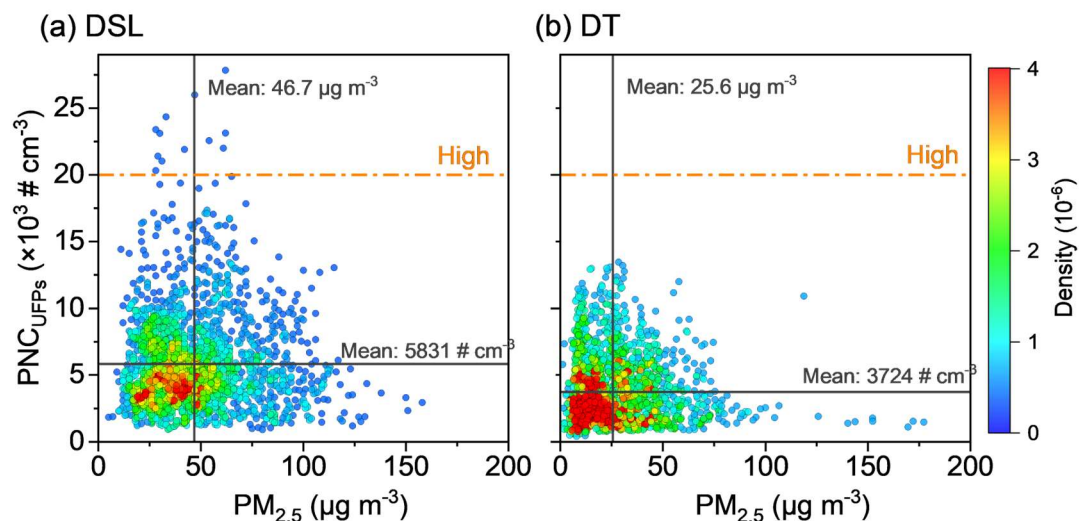

200

201 **Figure S3.** Scatterplots showing the relationship between hourly  $PM_{2.5}$  mass  
 202 concentration and  $PNC_{UFPs}$  at DSL (a) and DT (b) sites, the color scales of the dots  
 203 represent the density distribution of dots. The vertical and horizontal black lines  
 204 indicate the averages of  $PM_{2.5}$  and UFPs, respectively, while the orange dash-dotted  
 205 line represents the hourly high values ( $20,000 \# \text{ cm}^{-3}$ ) suggested by WHO AQG2021.<sup>16</sup>

206

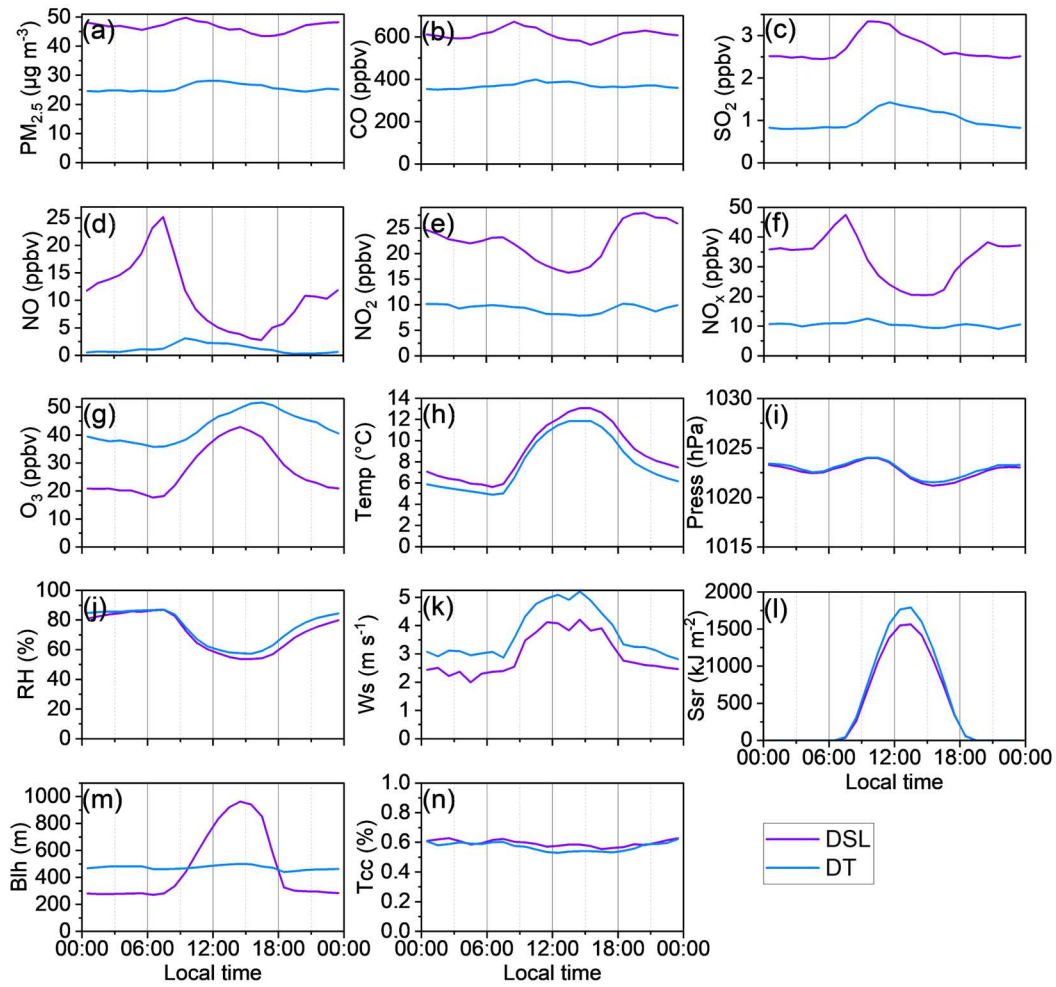

207

208 **Figure S4.** Diurnal variations of the average concentrations of criteria pollutants (a–g)  
 209 and meteorological parameters at DSL and DT sites (h–n). Temp, Press, RH, Ws, SSr,  
 210 Blh and Tcc represents ambient temperature, surface pressure, relative humidity, wind  
 211 speed, surface solar radiation, boundary layer height and total cloud cover, respectively.

212

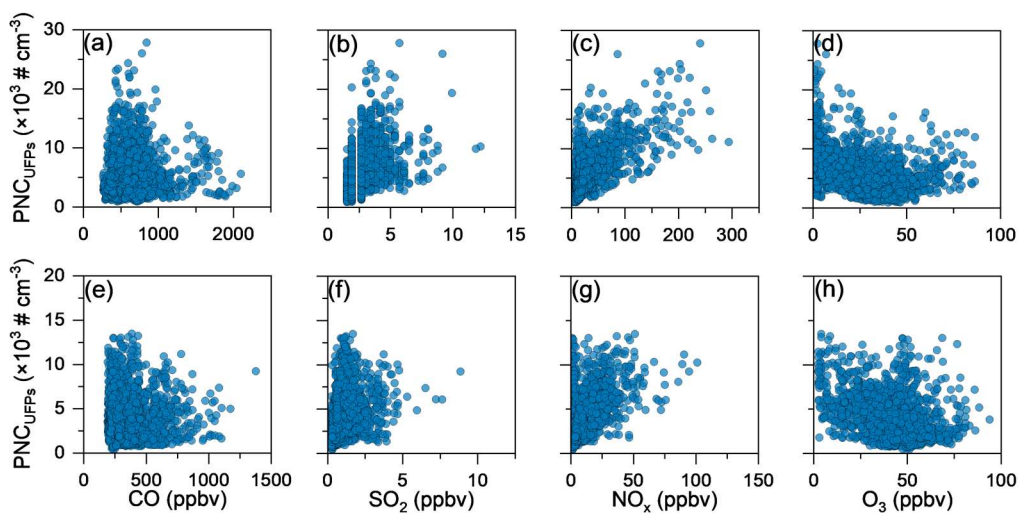

213

214 **Figure S5.** Scatterplots between mixing ratio of CO (a, e), SO<sub>2</sub> (b, f), NO<sub>x</sub> (c, g) and

215 O<sub>3</sub> (d, h) and PNC<sub>UFPs</sub> at DSL (top panel) and DT (bottom panel) sites.

216

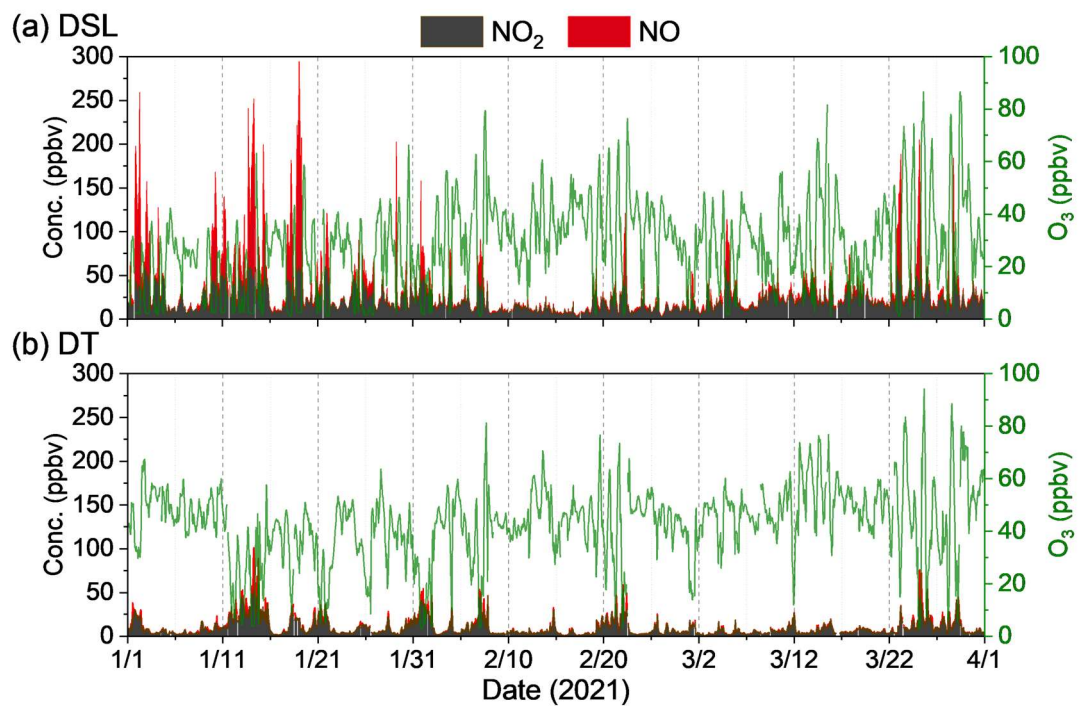

217

218 **Figure S6.** Time series of NO, NO<sub>2</sub> and O<sub>3</sub> at DSL (a) and DT (b) sites.

219

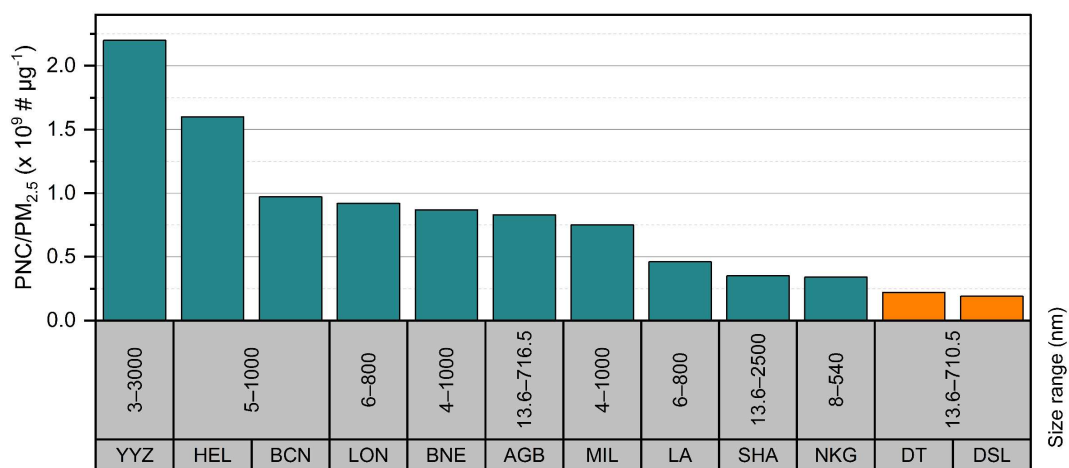

220

221 **Figure S7.** Comparison of the ratios between medians of PNC and PM<sub>2.5</sub> at cities as  
 222 well as two suburban background sites (bars marked in orange) in this study. Data for  
 223 other cities (bars marked in green) are from the investigation by de Jesus et al.<sup>4</sup>. The  
 224 size ranges of PNSD are summarized in the table under graph.

225



226 **NMF validation.**

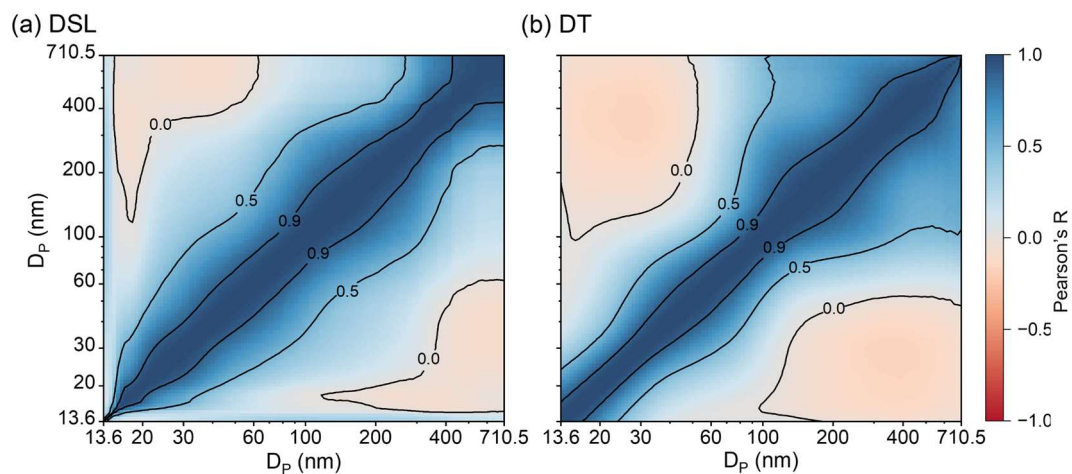

227

228 **Figure S8.** The contour graph of Pearson's R between each particle size bin of PNSD

229 data at DSL (a) and DT (b) sites.

230



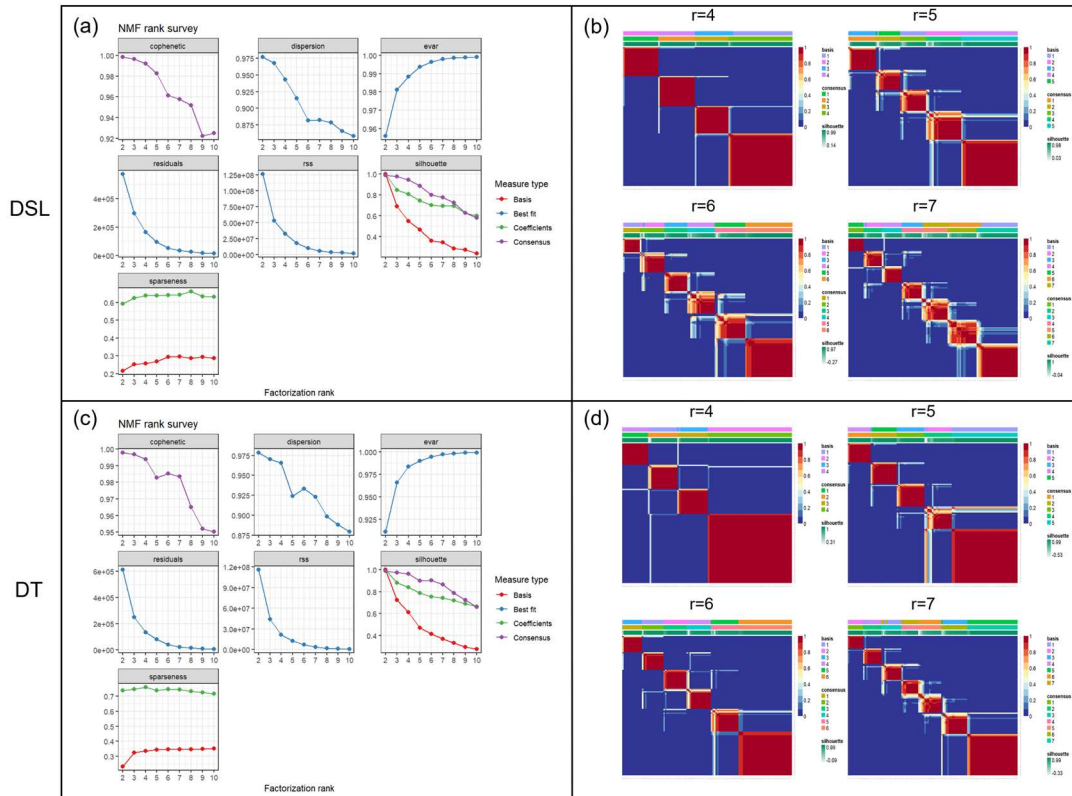

231

232 **Figure S9.** NMF rank survey for determine the optimal number of factors ( $r$ ) at DSL

233 (a, b) and DT (c, d) sites.

234

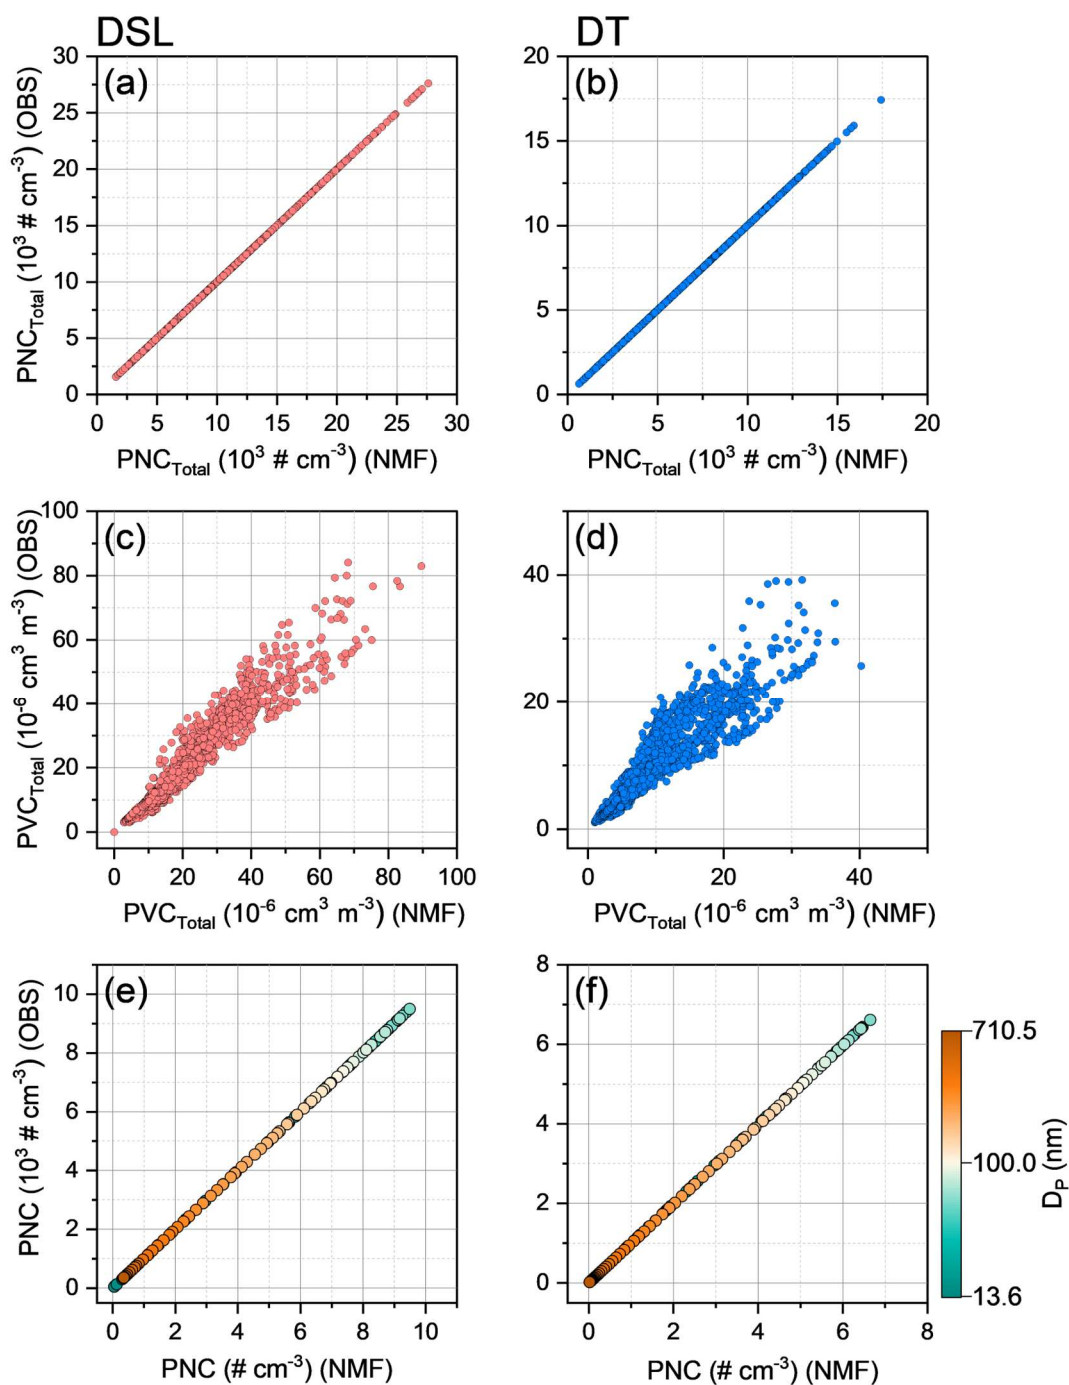

235

236 **Figure S10.** Scatterplots of the PNC (a, b) and PVC (c, d) of observed (OBS) against  
 237 NMF output (NMF) at the DSL (left panel) and DT (right panel) sites. Scatterplots  
 238 between the mean concentrations of OBS and NMF at the DSL (left panel) and DT  
 239 (right panel) sites. The color scales of the dots represent the particle size bin of the  
 240 SMPS measurement data.

241

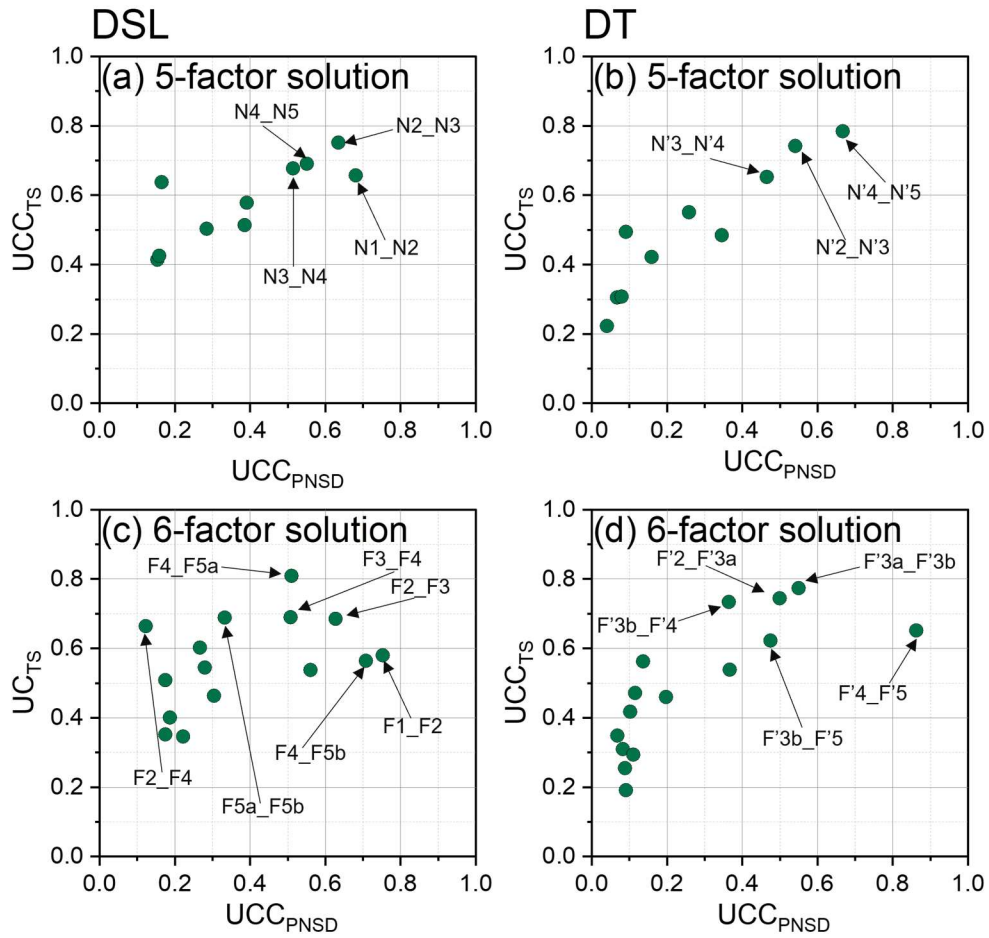

242

243 **Figure S11.** The uncentered correlation coefficient (UCC) of the time spectrum (TS)

244 and PNSD between each of the 5 and 6 factor solutions of DSL (left panel) and DT

245 (right panel) sites. Labels are shown when  $UCC > 0.6$ .

246

DSL

DT

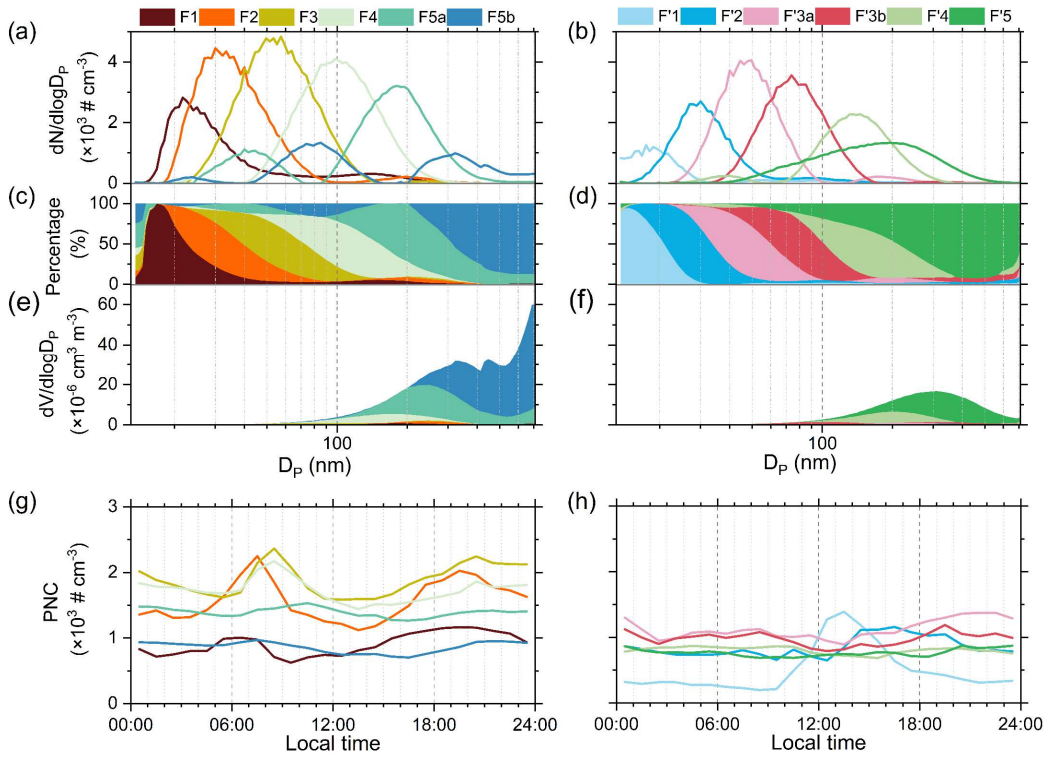

247

248 **Figure S12.** 6-factor NMF solution. PNC distributions (a, b), and corresponding  
 249 contribution portions to PNC (c, d), PVC distributions (e, f) and diurnal variations (e,  
 250 f) of the averages resolved factors at DSL (left panel) and DT (right panel) sites,  
 251 respectively.

252

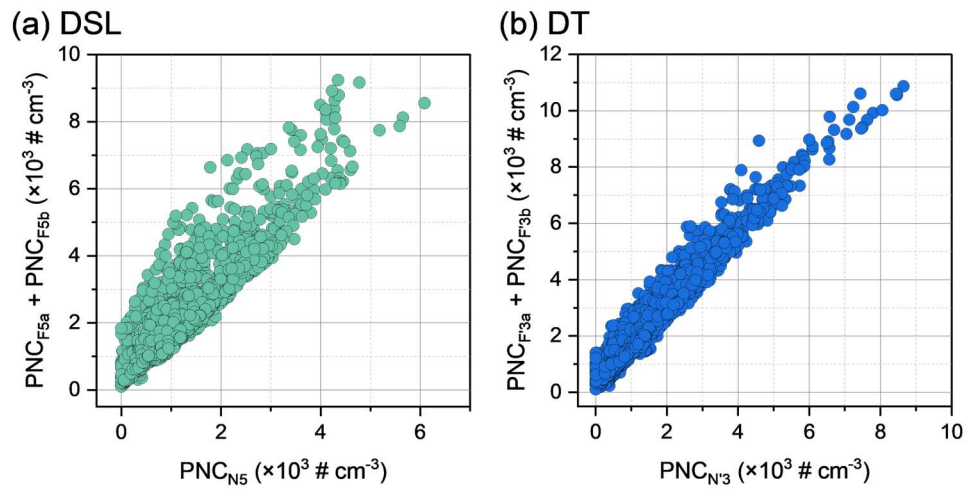

253

254 **Figure S13.** Scatterplots depicting the difference between the 5 factors and 6 factors

255 solutions of DSL (a) and DT (b) sites. “N” and “F” represent the 5- and 6-factor

256 solutions, respectively.

257

258 **Source identification.**

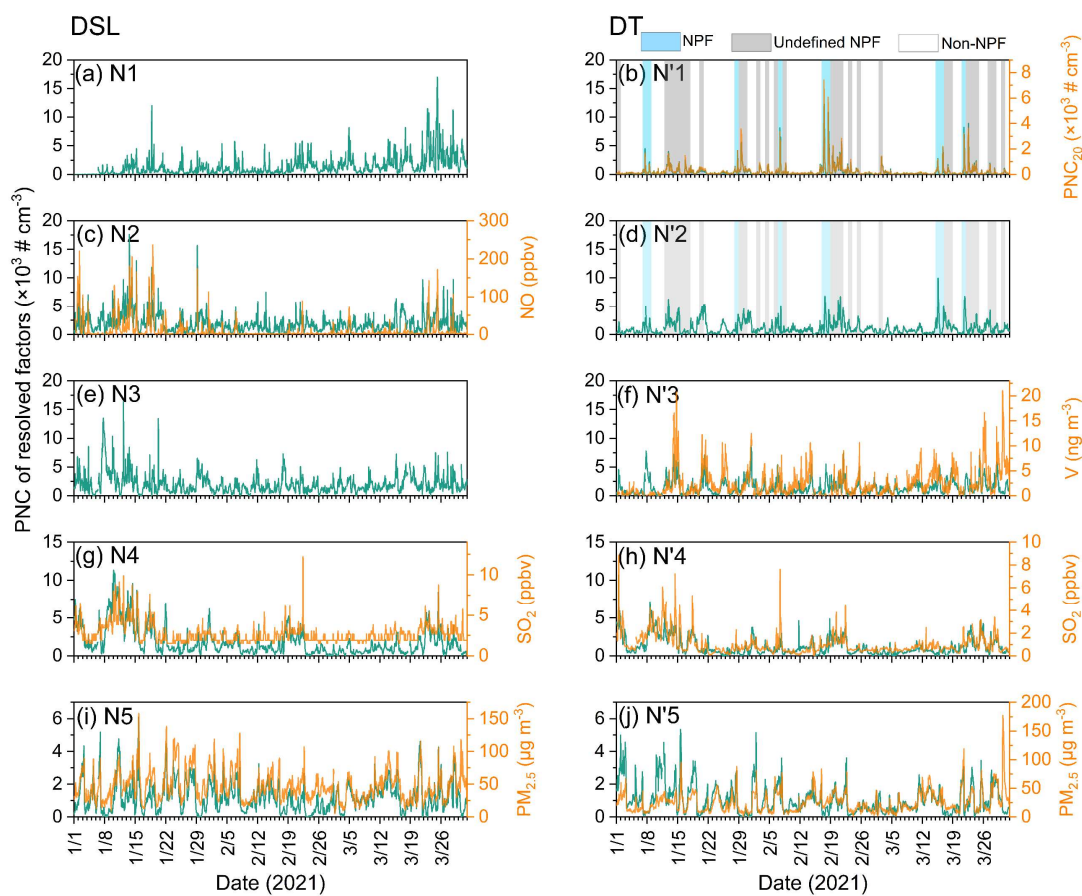

259

260 **Figure S14.** Time series plots of resolved factors at DSL (left panel) and DT (right  
 261 panel) sites. Some correlated criteria pollutants and PM<sub>2.5</sub>-bound V are plotted  
 262 correspondingly. At DT site, NPF, undefined NPF and non-NPF days are marked with  
 263 different color shading.

264

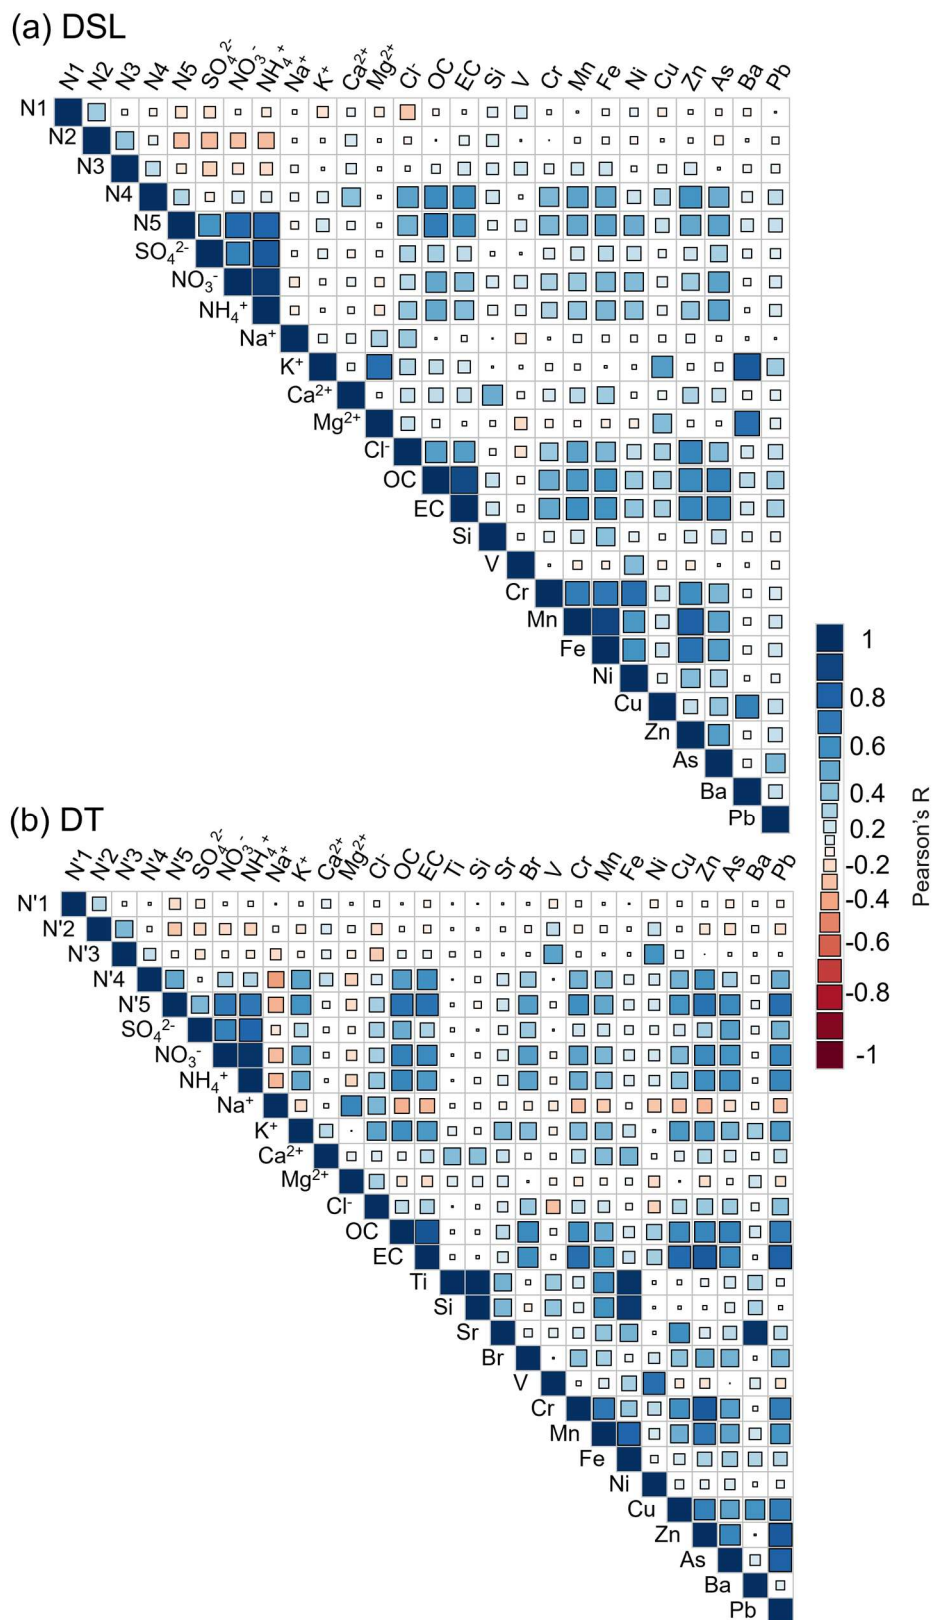

265

266 **Figure S15.** Pearson's correlation heatmaps between the resolved factors and chemical

267 components of PM<sub>2.5</sub> at DSL (a) and DT (b) sites.

268



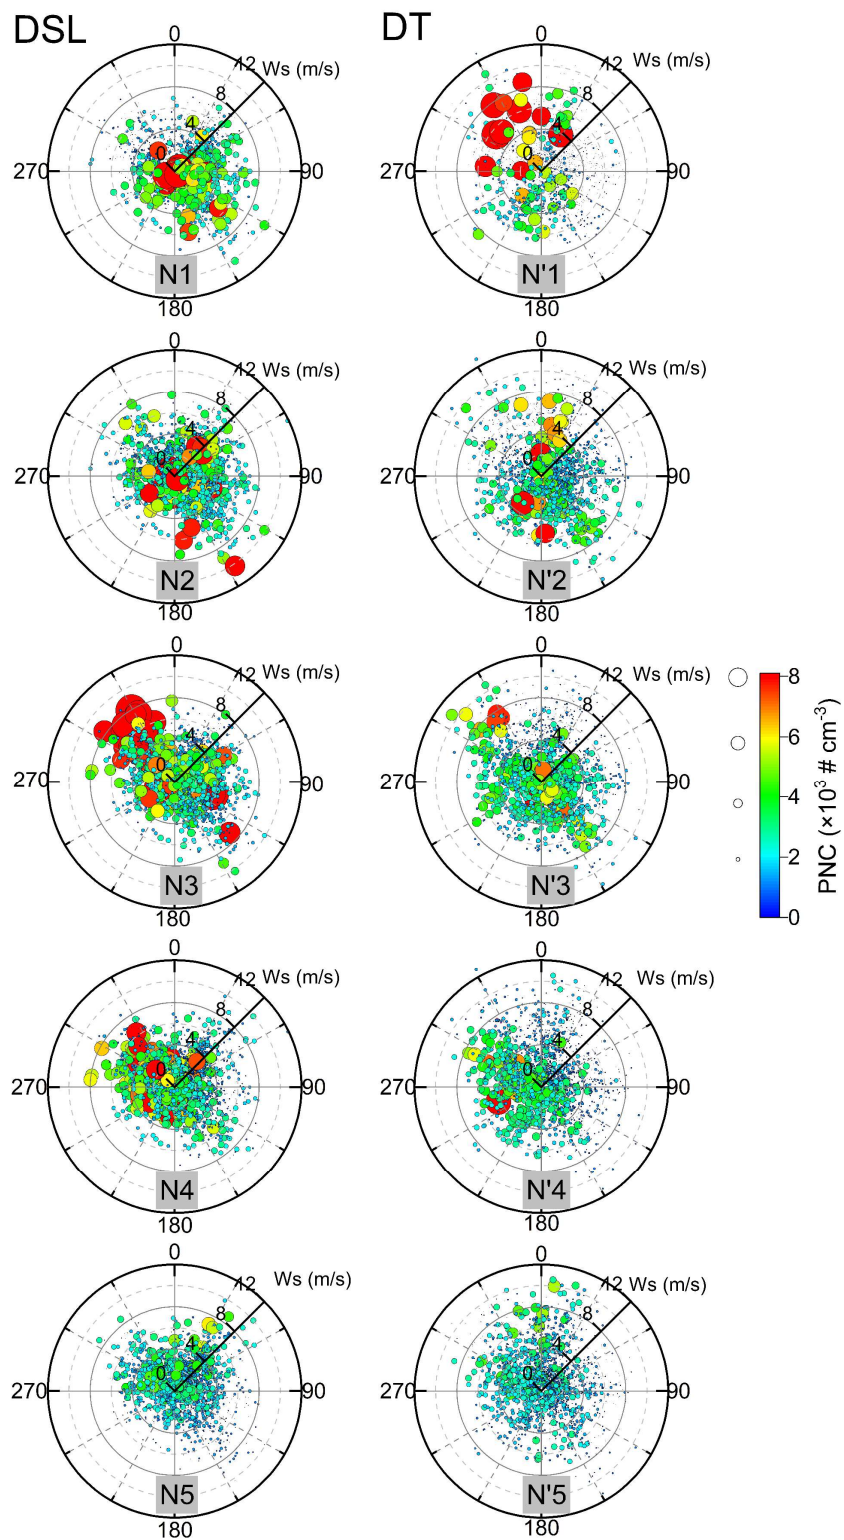

269

270 **Figure S16.** Polar plots of the resolved factors at DSL (left panel) and DT (right panel)

271 sites, the color scales and size of the dots represent PNC of resolved factors.

272



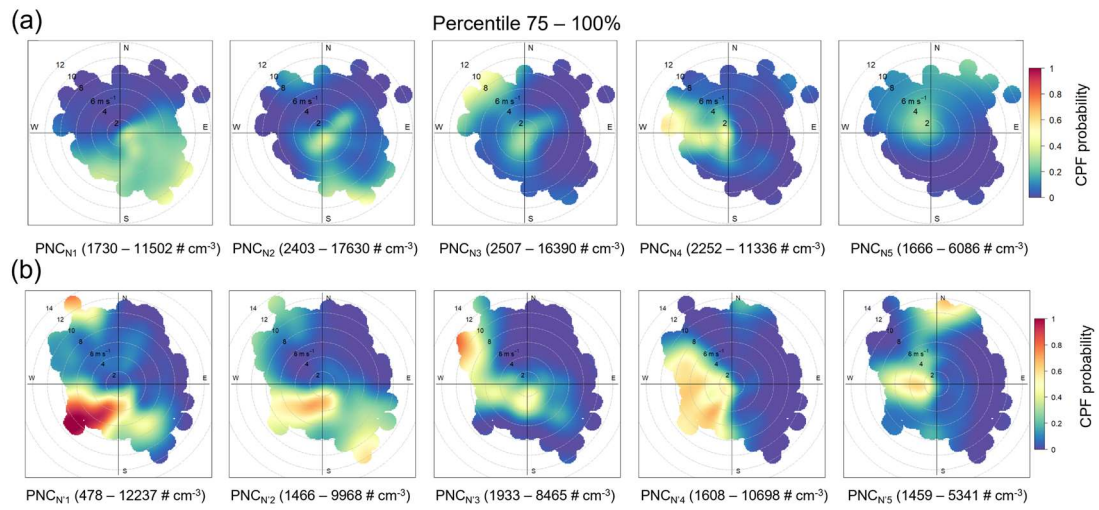

273

274 **Figure S17.** The conditional probability function (CPF) polar plots for the 75<sup>th</sup>–100<sup>th</sup>

275 percentiles of resolved factors at DSL (a) and DT (b) sites.

276

277 **Marine ship emissions.**

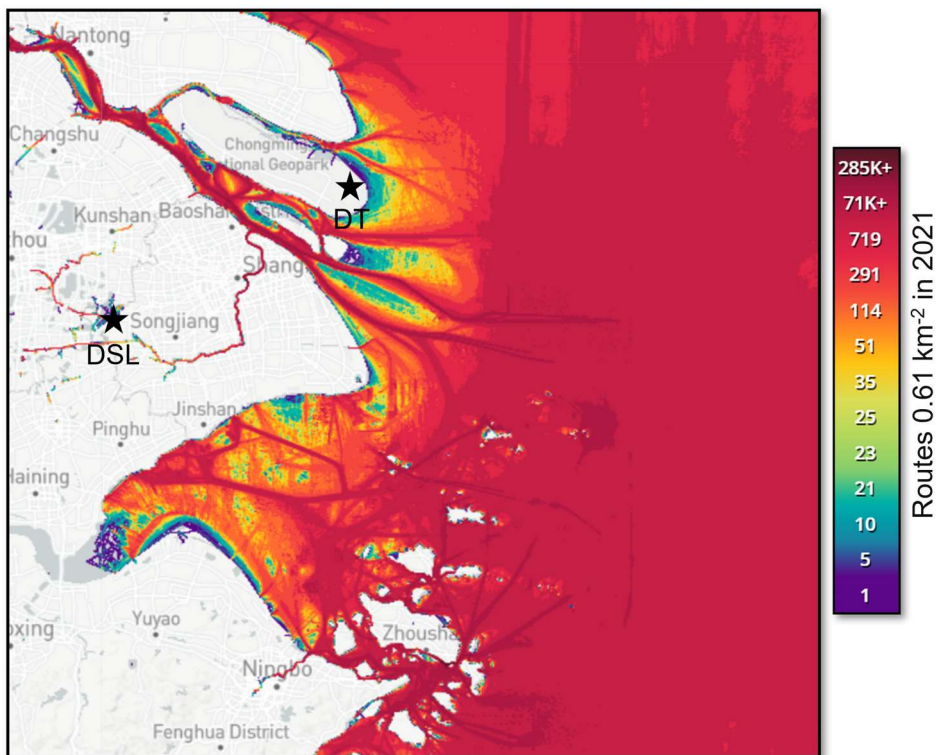

278

279 **Figure S18.** Heatmap of navigation routes of ships close to Shanghai in 2021.

280 (<https://www.marinetraffic.com/en/ais/home/centerx>, last accesses: May 2023). DSL

281 and DT sites are marked in black stars.

282

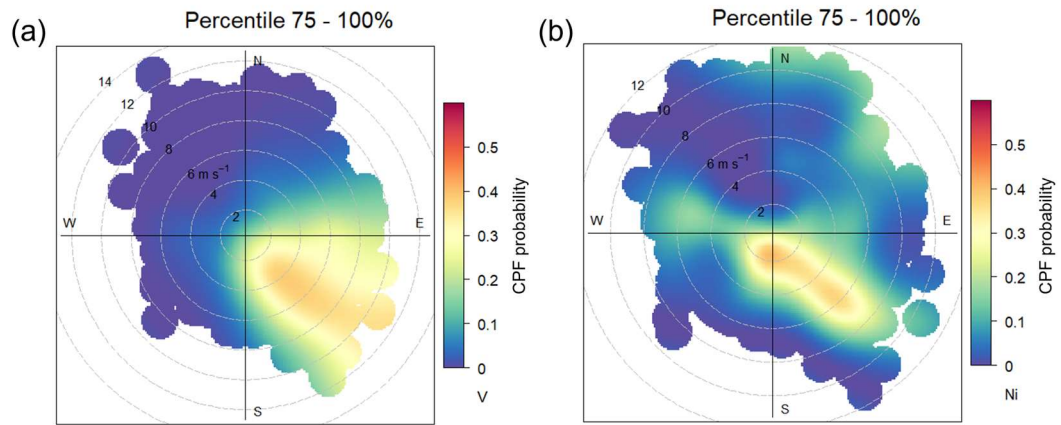

283

284 **Figure S19.** The CPF polar plots for the 75<sup>th</sup>–100<sup>th</sup> percentiles of V (a) and Ni (b) at

285 the DT site.

286

287 **Nucleation.**

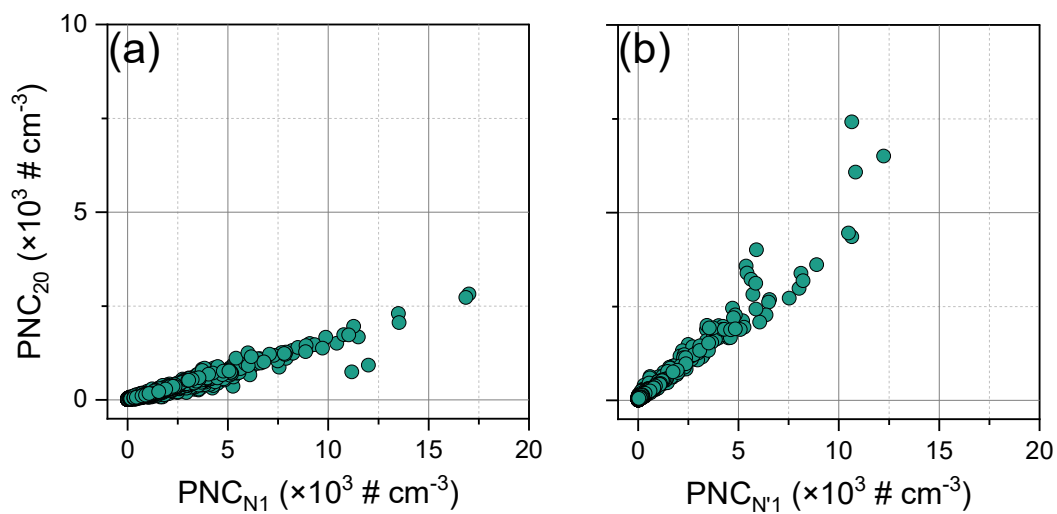

288

289 **Figure S20.** Scatterplots of PNC<sub>N1</sub> (a) and PNC<sub>N1</sub> (b) at DSL and DT sites against the  
290 measured PNC below 20 nm (PNC<sub>20</sub>).

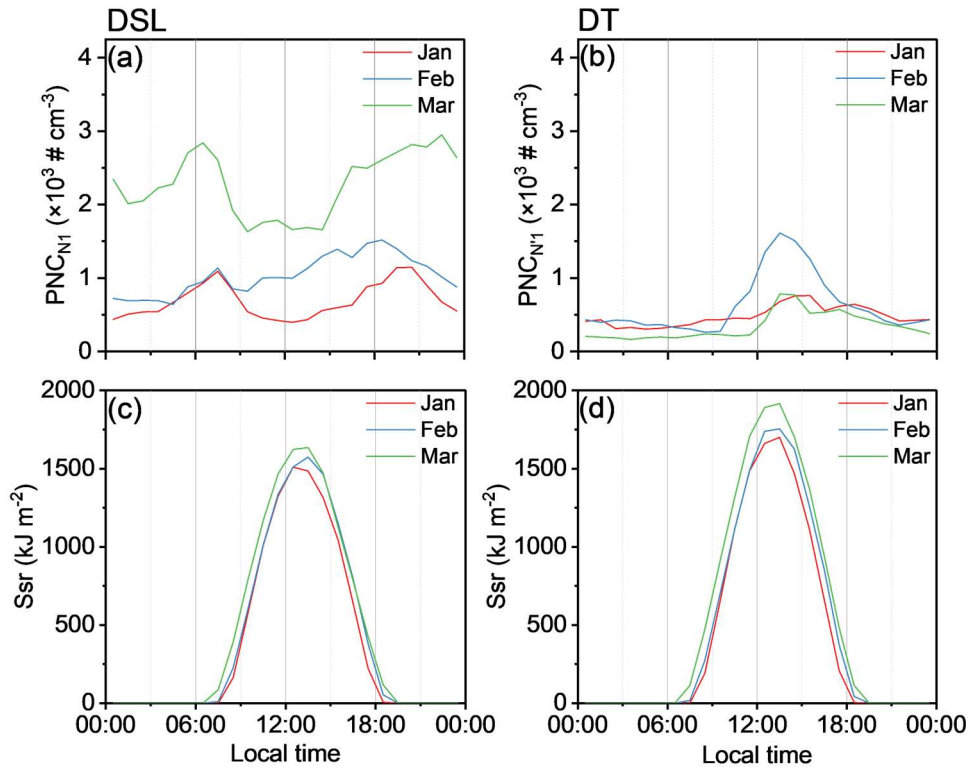

291

292 **Figure S21.** Diurnal variations of the averages of PNC<sub>N1</sub> (a), PNC<sub>N1</sub> (b) and Ssr (c, d)

293 at DSL (left panel) and DT (right panel) sites within each month.

294

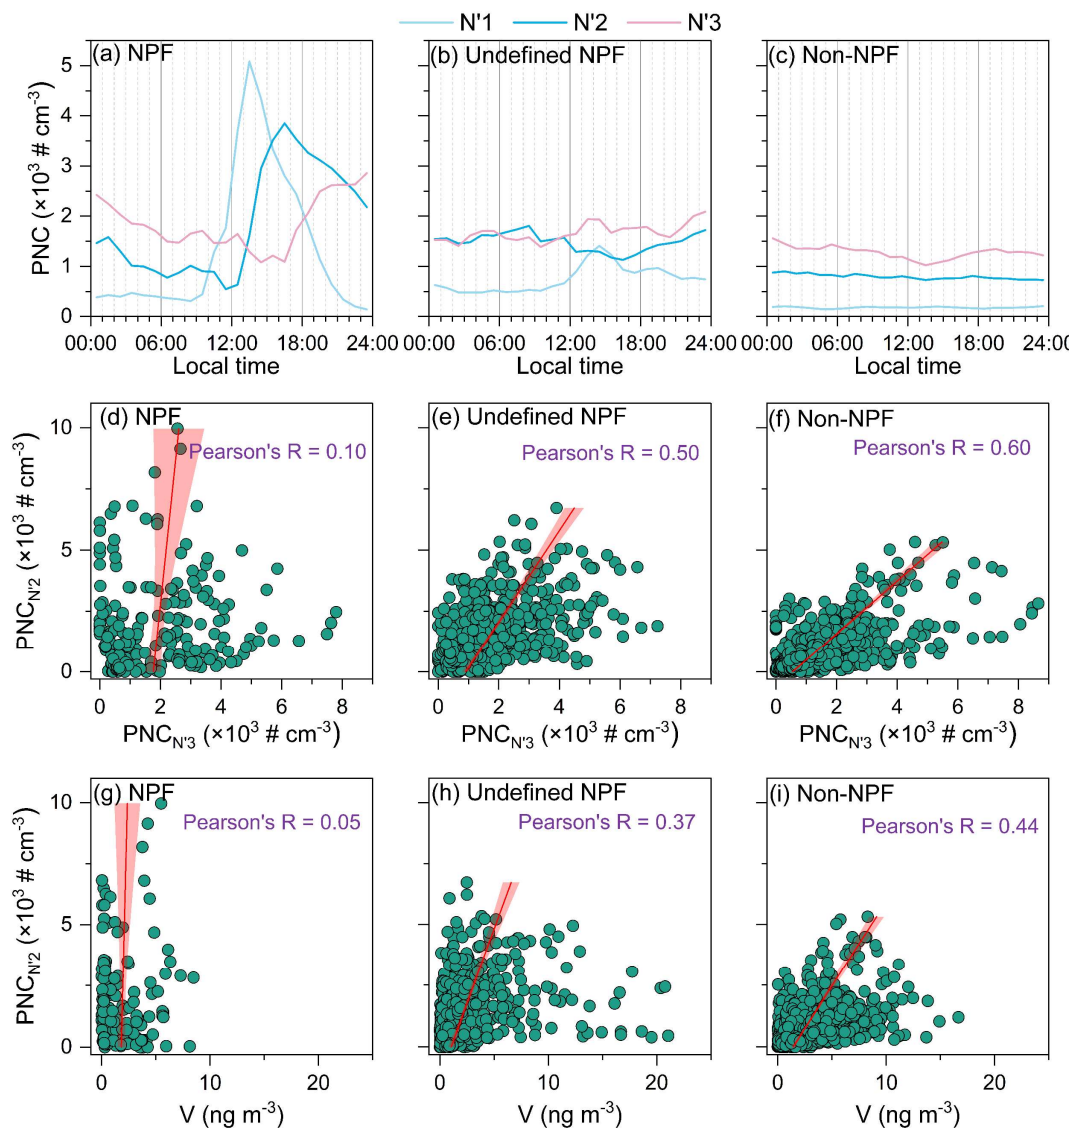

295

296 **Figure S22.** Diurnal variations of average PNC<sub>N'1</sub>, PNC<sub>N'2</sub> and PNC<sub>N'3</sub> for NPF (a),

297 undefined NPF (b) and non-NPF days (c). Scatterplots between PNC<sub>N'2</sub> and PNC<sub>N'3</sub> (c,

298 d, e), and between PNC<sub>N'2</sub> and V (g, h, i) are plotted correspondingly.

299

300 **Industrial emissions and regional background.**

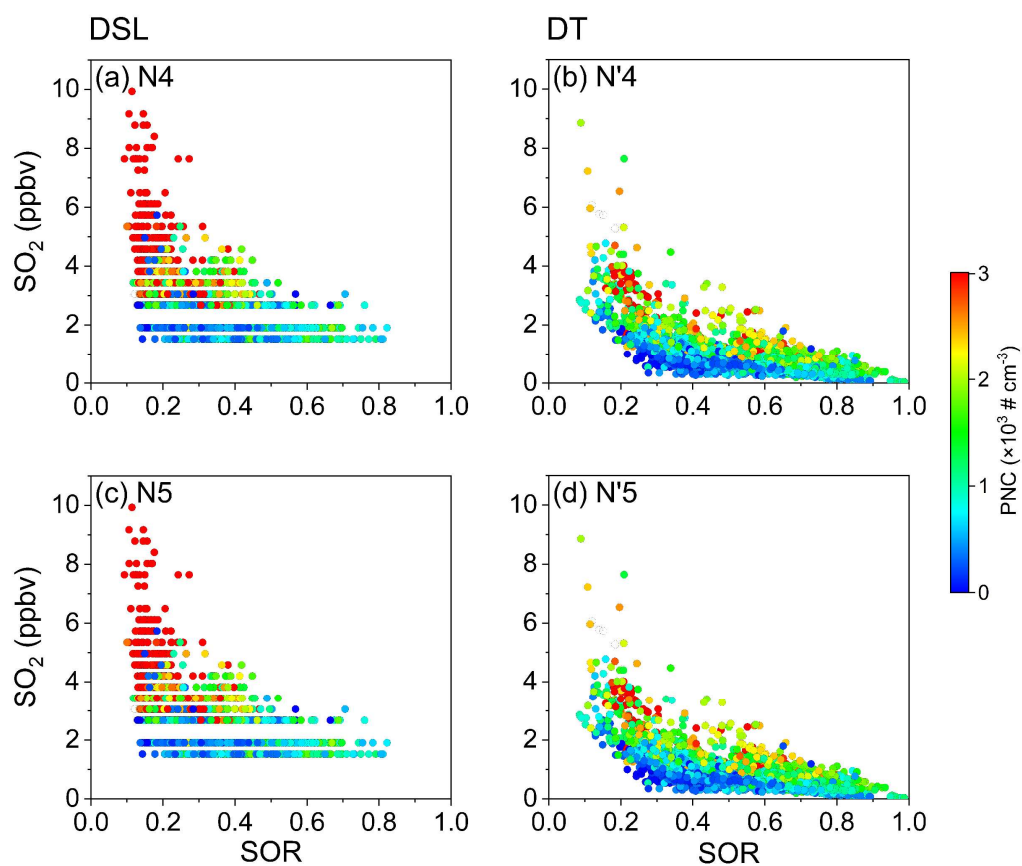

301

302 **Figure S23.** Scatterplots between SO<sub>2</sub> and sulfur oxidation ratio (SOR) for DSL (left

303 panel) and DT (right panel) sites, the color scales of the dots represent the PNC<sub>N4</sub> (a),

304 PNC<sub>N'4</sub> (b), PNC<sub>N5</sub> (c) and PNC<sub>N'5</sub> (d), respectively.

305



306 **Specific Events.**

(a) DSL

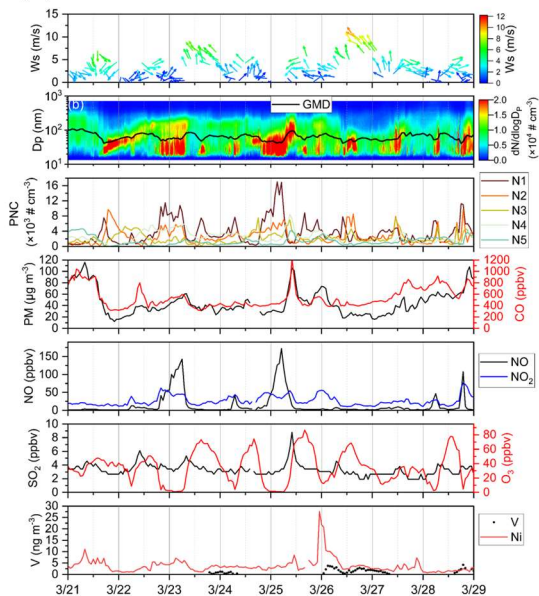

(b) DT

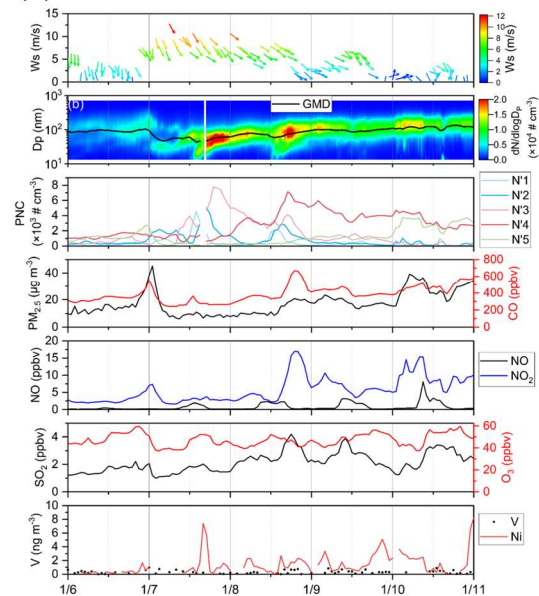

(c) DT

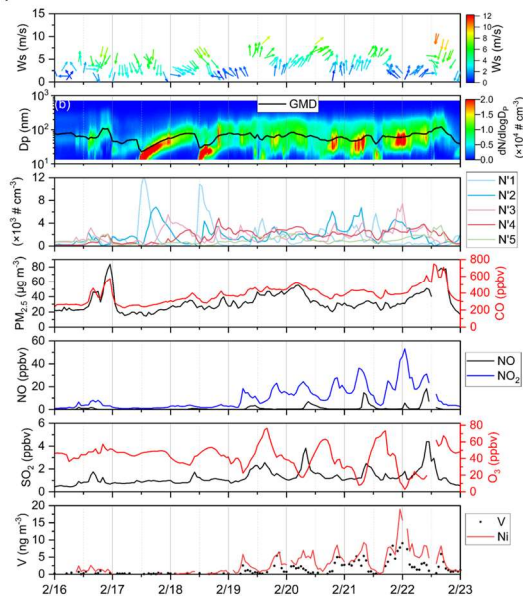

307

308 **Figure S24.** Time series of the resolved PNC factors and PM<sub>2.5</sub>, CO, NO, NO<sub>2</sub>, O<sub>3</sub>, and

309 V and Ni in PM<sub>2.5</sub> in specific events at DSL (a) and DT (b and c) sites.

310



311 **Respiratory deposition.**

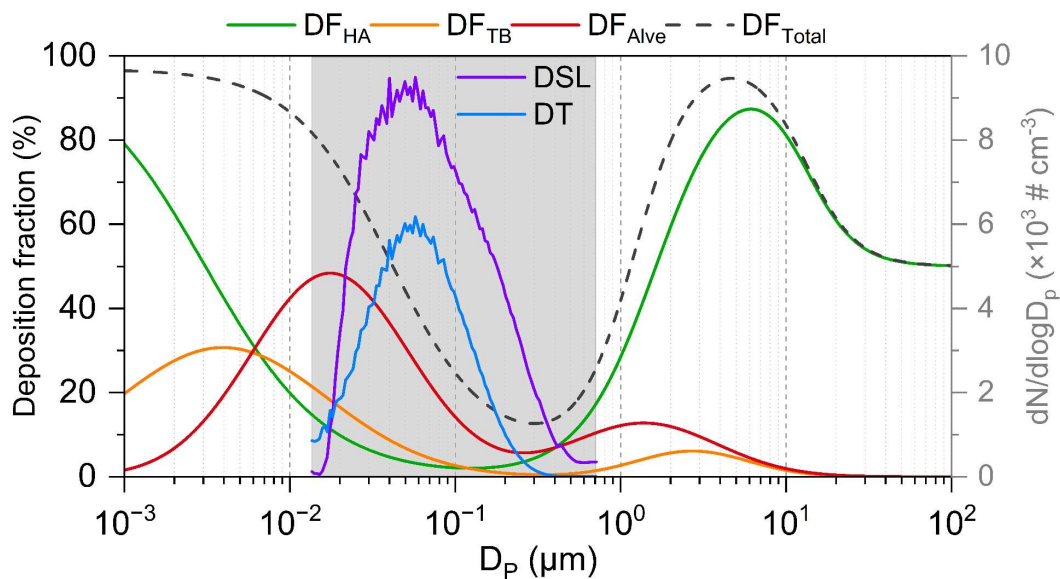

312

313 **Figure S25.** Curve of respiration deposition efficiency defined by the ICRP model. The  
314 green, orange and red lines represent the deposition efficiency of particles in head  
315 airways (HA), tracheobronchial region (TB) and alveolar region (Alve), respectively,  
316 and the black dashed line represents the total deposition efficiency. The blue shaded  
317 range indicates the range of PNSD in this study. The blue and purple lines represent the  
318 average PNSD observed at DSL and DT sites, respectively.

319

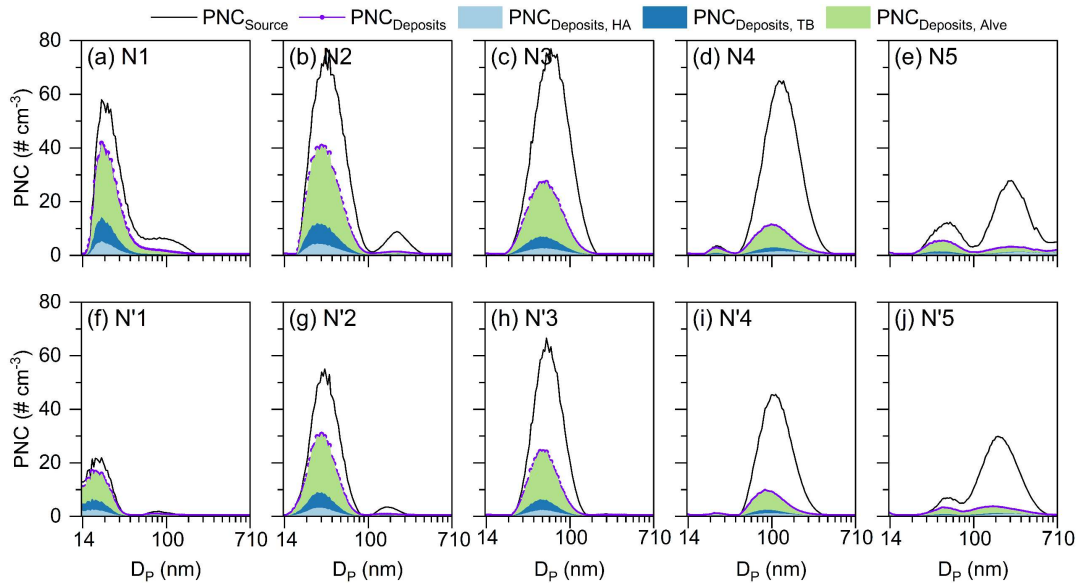

320

321 **Figure S26.** The PNCSD and deposition profiles in various regions of the respiratory

322 system of each source for DSL (top panel, N1–N5) and DT (bottom panel, N'1–N'5)

323 sites.

324

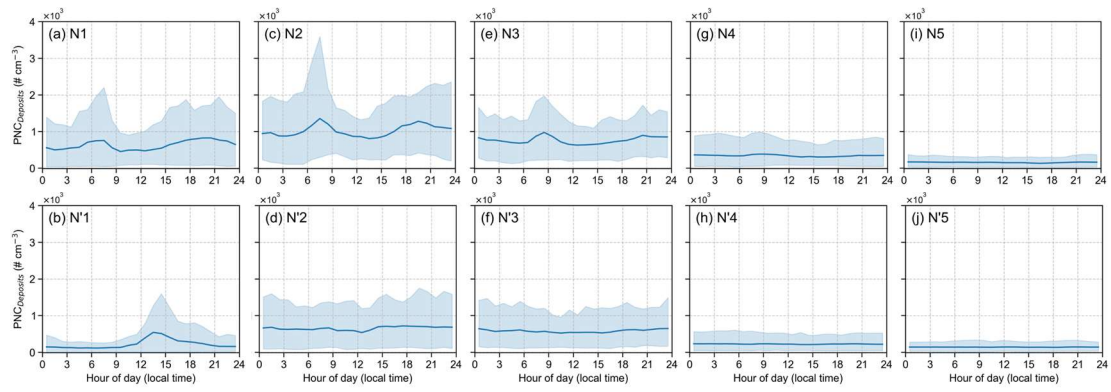

325

326 **Figure S27.** Diurnal variations of the averages  $PNC_{Deposits}$  at the DSL (top panel) and  
 327 DT (bottom panel) sites, the lower and upper boundaries of the shade represent 10<sup>th</sup>–  
 328 90<sup>th</sup>-percentile of  $PNC_{Deposits}$ , respectively.  
 329

330 **Table S1.** Locations of sites and the number of PNSD during the measurement.

| <b>Sites</b>               | <b>Location</b>        | <b>No. of hourly observations</b> | <b>No. (Proportion) of missing data</b> |
|----------------------------|------------------------|-----------------------------------|-----------------------------------------|
| <b>Dianshan Lake (DSL)</b> | 31.10° N,<br>120.98° E | 237,984                           | 2438 (1.0%)                             |
| <b>Dongtan (DT)</b>        | 31.52° N,<br>121.97° E | 239,095                           | 422 (0.2%)                              |

331

332 **Table S2.** Pearson's R of the hourly PNC and criteria pollutants at DSL and DT sites  
 333 either in raw or in lognormal form.

| Sites | Form      | PNC                  | PM <sub>2.5</sub> | CO    | NO <sub>x</sub> | O <sub>3</sub> | SO <sub>2</sub> |
|-------|-----------|----------------------|-------------------|-------|-----------------|----------------|-----------------|
| DSL   | Linear    | PNC <sub>UFPs</sub>  | -0.02             | 0.01  | 0.67            | -0.37          | 0.47            |
|       |           | PNC <sub>Total</sub> | 0.18              | 0.21  | 0.74            | -0.42          | 0.62            |
|       | Lognormal | PNC <sub>UFPs</sub>  | -0.01             | 0.03  | 0.67            | -0.43          | 0.55            |
|       |           | PNC <sub>Total</sub> | 0.23              | 0.25  | 0.75            | -0.5           | 0.67            |
| DT    | Linear    | PNC <sub>UFPs</sub>  | -0.01             | 0.01  | 0.57            | -0.36          | 0.37            |
|       |           | PNC <sub>Total</sub> | 0.18              | 0.26  | 0.67            | -0.37          | 0.59            |
|       | Lognormal | PNC <sub>UFPs</sub>  | 0.07              | -0.01 | 0.61            | -0.38          | 0.49            |
|       |           | PNC <sub>Total</sub> | 0.31              | 0.27  | 0.72            | -0.39          | 0.66            |

|            |   |     |   |      |    |
|------------|---|-----|---|------|----|
| Person's R | 1 | 0.5 | 0 | -0.5 | -1 |
|------------|---|-----|---|------|----|

334  
 335

336 **Table S3.** Nonparametric tests were performed on the concentrations of V  
 337 corresponding to data above the 90<sup>th</sup> percentile for the five factors at the DT site.

| Sources | N'1   | N'2        | N'3        | N'4        | N'5        |
|---------|-------|------------|------------|------------|------------|
| N'1     |       | <0.001 *** | 0 ***      | 0.847      | 0.936      |
| N'2     | 0 *** |            | <0.001 *** | <0.001 *** | <0.001 *** |
| N'3     | 0 *** | <0.001 *** |            | 0 ***      | 0 ***      |
| N'4     | 0.847 | <0.001 *** | 0 ***      |            | 0.787      |
| N'5     | 0.936 | <0.001 *** | 0 ***      | 0.787      |            |

338 Values in the table represent the level of significance and is denoted by P.  $P \leq 0.001$  are  
 339 denoted by \*\*\*.

340

341 **Table S4.** Summary of characteristics at DT site related to NPF events. The number of  
 342 days,  $PNC_{N'1}$  and  $PNC_{N'2}$ , and their corresponding time-weighted contribution to  
 343  $PNC_{N'2}$  during NPF, undefined NPF and non-NPF days, respectively.

|                      | <b>Number of</b> | <b><math>PNC_{N'1}</math></b>   | <b><math>PNC_{N'2}</math></b>   | <b>Time-weighted contribution</b> |
|----------------------|------------------|---------------------------------|---------------------------------|-----------------------------------|
|                      | <b>days</b>      | <b>(# <math>cm^{-3}</math>)</b> | <b>(# <math>cm^{-3}</math>)</b> | <b>to <math>PNC_{N'2}</math></b>  |
| <b>NPF</b>           | 9                | 1368                            | 1869                            | 17%                               |
| <b>Undefined NPF</b> | 28               | 751                             | 1484                            | 41%                               |
| <b>Non-NPF</b>       | 53               | 179                             | 794                             | 42%                               |

344

345 **Table S5.** Abbreviations in this study (in the order of initial letter).

| <b>Abbreviation</b>     | <b>Full name</b>                                                                                                                |
|-------------------------|---------------------------------------------------------------------------------------------------------------------------------|
| Alve                    | Alveolar                                                                                                                        |
| CMB                     | chemical mass balance                                                                                                           |
| CMD                     | count median diameters                                                                                                          |
| CPF                     | conditional probability functions                                                                                               |
| DECA                    | Domestic Emission Control Area                                                                                                  |
| EURO 7                  | European emission standard for vehicular exhausts                                                                               |
| GMD                     | geometric mean diameter                                                                                                         |
| HA                      | Head airway                                                                                                                     |
| ICRP                    | International Commission on Radiological Protection                                                                             |
| IMO                     | International Maritime Organization                                                                                             |
| J(NO <sub>2</sub> )     | photolysis rate of NO <sub>2</sub>                                                                                              |
| LDSA                    | lung deposited surface area                                                                                                     |
| Mode                    | the peak size in the distribution curve that represent<br>the most frequent particle size                                       |
| MOUDI                   | multiple-stage inertial impactors                                                                                               |
| MPPD                    | Multiple-Path Particle Dosimetry Model                                                                                          |
| Ni                      | Nickle                                                                                                                          |
| NMF                     | non-negative matrix factorization                                                                                               |
| PCA                     | principal components analysis                                                                                                   |
| PM <sub>2.5</sub>       | particulate matter with diameters $\leq 2.5 \mu\text{m}$                                                                        |
| PNC                     | particle number concentrations                                                                                                  |
| PNC <sub>Deposits</sub> | PNC deposited in the respiratory system                                                                                         |
| PNC <sub>Total</sub>    | PNC with size of 13.6–710.5 nm                                                                                                  |
| PNC <sub>UFPs</sub>     | PNC with size of 13.6–100 nm                                                                                                    |
| PNSD                    | particle number size distributions                                                                                              |
| PVC                     | particle volume concentration                                                                                                   |
| SNA                     | sulphate (SO <sub>4</sub> <sup>2-</sup> ), nitrate (NO <sub>3</sub> <sup>-</sup> ) and ammonium (NH <sub>4</sub> <sup>+</sup> ) |



---

|             |                                                                                |
|-------------|--------------------------------------------------------------------------------|
| SOR         | sulfur oxidation ratio                                                         |
| TB          | Tracheobronchial                                                               |
| UCC         | uncentered correlation coefficient                                             |
| UFPs        | ultrafine particles                                                            |
| V           | Vanadium                                                                       |
| WHO AQG2021 | World Health Organization's air quality guidelines<br>(latest release in 2021) |
| WD          | wind direction                                                                 |

---

347 **References**

- 348 1. G. Yang, J. Huo, L. Wang, Y. Wang, S. Wu, L. Yao, Q. Fu and L. Wang, Total OH Reactivity  
349 Measurements in a Suburban Site of Shanghai, *J. Geophys. Res.: Atmos.*, 2022, **127**,  
350 e2021JD035981.
- 351 2. A. Wiedensohler, W. Birmili, A. Nowak, A. Sonntag, K. Weinhold, M. Merkel, B. Wehner, T.  
352 Tuch, S. Pfeifer, M. Fiebig, A. M. Fjåraa, E. Asmi, K. Sellegri, R. Depuy, H. Venzac, P. Villani,  
353 P. Laj, P. Aalto, J. A. Ogren, E. Swietlicki, P. Williams, P. Roldin, P. Quincey, C. Hüglin, R.  
354 Fierz-Schmidhauser, M. Gysel, E. Weingartner, F. Riccobono, S. Santos, C. Grüning, K.  
355 Faloon, D. Beddows, R. Harrison, C. Monahan, S. G. Jennings, C. D. O'Dowd, A. Marinoni,  
356 H. G. Horn, L. Keck, J. Jiang, J. Scheckman, P. H. McMurry, Z. Deng, C. S. Zhao, M. Moerman,  
357 B. Henzing, G. de Leeuw, G. Löschau and S. Bastian, Mobility particle size spectrometers:  
358 harmonization of technical standards and data structure to facilitate high quality long-  
359 term observations of atmospheric particle number size distributions, *Atmos. Meas. Tech.*,  
360 2012, **5**, 657-685.
- 361 3. W. Sun, D. Wang, L. Yao, H. Fu, Q. Fu, H. Wang, Q. Li, L. Wang, X. Yang, A. Xian, G. Wang,  
362 H. Xiao and J. Chen, Chemistry-triggered events of PM<sub>2.5</sub> explosive growth during late  
363 autumn and winter in Shanghai, China, *Environmental Pollution*, 2019, **254**, 112864.
- 364 4. A. L. de Jesus, M. M. Rahman, M. Mazaheri, H. Thompson, L. D. Knibbs, C. Jeong, G. Evans,  
365 W. Nei, A. Ding, L. Qiao, L. Li, H. Portin, J. V. Niemi, H. Timonen, K. Luoma, T. Petäjä, M.  
366 Kulmala, M. Kowalski, A. Peters, J. Cyrys, L. Ferrero, M. Manigrasso, P. Avino, G. Buonano,  
367 C. Reche, X. Querol, D. Beddows, R. M. Harrison, M. H. Sowlat, C. Sioutas and L. Morawska,  
368 Ultrafine particles and PM<sub>2.5</sub> in the air of cities around the world: Are they representative  
369 of each other?, *Environment International*, 2019, **129**, 118-135.
- 370 5. Y. Ge, Q. Fu, M. Yi, Y. Chao, X. Lei, X. Xu, Z. Yang, J. Hu, H. Kan and J. Cai, High spatial  
371 resolution land-use regression model for urban ultrafine particle exposure assessment in  
372 Shanghai, China, *Science of The Total Environment*, 2022, **816**, 151633.
- 373 6. Z. Liu, B. Hu, J. Zhang, J. Xin, F. Wu, W. Gao, M. Wang and Y. Wang, Characterization of  
374 fine particles during the 2014 Asia-Pacific economic cooperation summit: Number  
375 concentration, size distribution and sources, *Tellus B: Chemical and Physical Meteorology*,  
376 2017, **69**, 1303228.
- 377 7. Y. Zhu, I. D. Sulaymon, X. Xie, J. Mao, S. Guo, M. Hu and J. Hu, Airborne particle number  
378 concentrations in China: A critical review, *Environmental Pollution*, 2022, **307**, 119470.
- 379 8. NMF: Algorithms and Framework for Nonnegative Matrix Factorization (NMF),  
380 <https://cran.r-project.org/package=NMF>, (accessed January 2023).
- 381 9. missForest: Nonparametric Missing Value Imputation using Random Forest,  
382 <https://cran.r-project.org/package=missForest>, (accessed January 2023).
- 383 10. D. J. Stekhoven and P. Bühlmann, MissForest—non-parametric missing value imputation  
384 for mixed-type data, *Bioinformatics*, 2012, **28**, 112-118.
- 385 11. R. Gaujoux and C. Seoighe, A flexible R package for nonnegative matrix factorization, *BMC*  
386 *Bioinformatics*, 2010, **11**, 367.
- 387 12. J.-P. Brunet, P. Tamayo, T. R. Golub and J. P. Mesirov, Metagenes and molecular pattern  
388 discovery using matrix factorization, *Proceedings of the National Academy of Sciences*,  
389 2004, **101**, 4164-4169.

- 390 13. L. N. Hutchins, S. M. Murphy, P. Singh and J. H. Graber, Position-dependent motif  
391 characterization using non-negative matrix factorization, *Bioinformatics*, 2008, **24**, 2684-  
392 2690.
- 393 14. I. M. Ulbrich, M. R. Canagaratna, Q. Zhang, D. R. Worsnop and J. L. Jimenez, Interpretation  
394 of organic components from Positive Matrix Factorization of aerosol mass spectrometric  
395 data, *Atmos. Chem. Phys.*, 2009, **9**, 2891-2918.
- 396 15. ICRP, The New ICRP Model for the Respiratory Tract, *Radiation Protection Dosimetry*, 1994,  
397 **53**, 107-114.
- 398 16. WHO, *WHO global air quality guidelines: particulate matter (PM<sub>2.5</sub> and PM<sub>10</sub>), ozone,*  
399 *nitrogen dioxide, sulfur dioxide and carbon monoxide*, Report 9789240034228, World  
400 Health Organization, Geneva, 2021.
- 401
